# Supplementary material for: Resilin Distribution and Abundance in Apis mellifera across Biological Age Classes and Castes
Source: MDPI journal article supplement (doi:10.3390/insects14090764), 2023-09-13
Supplement: s1 [file s1]

## Supplementary Material

Table S1. Pro-resilin gene expression pairwise comparisons

| Groups            | d           | Z         | P     |
|-------------------|-------------|-----------|-------|
| Pupae:Hatchling   | 1.579546314 | 4.116963  | 0.001 |
| Pupae:Nurse       | 1.594999201 | 3.954266  | 0.001 |
| Pupae:Forager     | 1.576622853 | 4.289293  | 0.001 |
| Pupae:Drone       | 1.584572668 | 4.057029  | 0.001 |
| Hatchling:Nurse   | 0.015452888 | -1.772973 | 0.957 |
| Hatchling:Forager | 0.002923461 | -2.183139 | 0.990 |
| Hatchling:Drone   | 0.005026354 | -2.112737 | 0.985 |
| Nurse:Forager     | 0.018376348 | -1.658888 | 0.947 |
| Nurse:Drone       | 0.010426533 | -1.854225 | 0.964 |
| Forager: Drone    | 0.007949815 | -1.874002 | 0.966 |

Table S2. Resilin autofluorescence pairwise comparisons

| Joint     | Comparison        | Difference | UCL (95%)  | Z          | Pr > d |
|-----------|-------------------|------------|------------|------------|--------|
| 1m-cu LFV | Hatchling:Nest    | 57263.304  | 25317.4455 | 3.44131179 | 0.001  |
| 1m-cu LFV | Hatchling:Forager | 69035.7392 | 28250.146  | 3.49431687 | 0.001  |
| 1m-cu LFV | Hatchling:Drone   | 46930.0498 | 29836.1852 | 2.46024538 | 0.004  |
| 1m-cu LFV | Nest:Forager      | 11772.4352 | 25275.9272 | 0.32364323 | 0.404  |
| 1m-cu LFV | Nest:Drone        | 10333.2542 | 29037.0123 | 0.03615677 | 0.505  |
| 1m-cu LFV | Forager:Drone     | 22105.6894 | 31876.7721 | 0.94777065 | 0.186  |
| 1m-cu RFV | Hatchling:Nest    | 70324.6618 | 28806.2814 | 3.60452215 | 0.001  |
| 1m-cu RFV | Hatchling:Forager | 93316.7512 | 33453.9762 | 4.02039391 | 0.001  |
| 1m-cu RFV | Hatchling:Drone   | 55003.0397 | 37371.7886 | 2.46272979 | 0.003  |
| 1m-cu RFV | Nest:Forager      | 22992.0894 | 30558.4961 | 1.13748583 | 0.13   |
| 1m-cu RFV | Nest:Drone        | 15321.6221 | 33072.8736 | 0.32977315 | 0.388  |
| 1m-cu RFV | Forager:Drone     | 38313.7115 | 35935.828  | 1.63747421 | 0.037  |
| Cu-V LFV  | Hatchling:Nest    | 132753.223 | 38658.5587 | 4.29623782 | 0.001  |
| Cu-V LFV  | Hatchling:Forager | 114969.295 | 45917.0984 | 3.53513115 | 0.001  |

|                 |                          |                   |                   |                   |              |
|-----------------|--------------------------|-------------------|-------------------|-------------------|--------------|
| <b>Cu-V LFV</b> | <b>Hatchling:Drone</b>   | <b>96066.7241</b> | <b>48502.4515</b> | <b>2.90827601</b> | <b>0.001</b> |
| Cu-V LFV        | Nest:Forager             | 17783.9283        | 42986.5627        | 0.2621798         | 0.422        |
| Cu-V LFV        | Nest:Drone               | 36686.4993        | 43121.9875        | 1.30343222        | 0.096        |
| Cu-V LFV        | Forager:Drone            | 18902.571         | 50758.1927        | 0.1068824         | 0.476        |
| <b>Cu-V RFV</b> | <b>Hatchling:Nest</b>    | <b>133513.282</b> | <b>36701.8088</b> | <b>4.58908456</b> | <b>0.001</b> |
| <b>Cu-V RFV</b> | <b>Hatchling:Forager</b> | <b>101749.066</b> | <b>40945.001</b>  | <b>3.59836823</b> | <b>0.001</b> |
| <b>Cu-V RFV</b> | <b>Hatchling:Drone</b>   | <b>116430.4</b>   | <b>45739.336</b>  | <b>3.55974306</b> | <b>0.001</b> |
| Cu-V RFV        | Nest:Forager             | 31764.2157        | 35935.2966        | 1.357537          | 0.091        |
| Cu-V RFV        | Nest:Drone               | 17082.8812        | 43324.9488        | 0.21792428        | 0.436        |
| Cu-V RFV        | Forager:Drone            | 14681.3346        | 46821.7216        | -0.0686192        | 0.544        |
| <b>CU-V LHV</b> | <b>Hatchling:Nest</b>    | <b>77861.741</b>  | <b>31073.9558</b> | <b>3.62298199</b> | <b>0.001</b> |
| <b>CU-V LHV</b> | <b>Hatchling:Forager</b> | <b>53534.4025</b> | <b>39401.6163</b> | <b>2.18067995</b> | <b>0.005</b> |
| <b>CU-V LHV</b> | <b>Hatchling:Drone</b>   | <b>44920.1757</b> | <b>40569.8623</b> | <b>1.72569372</b> | <b>0.032</b> |
| CU-V LHV        | Nest:Forager             | 24327.3385        | 34541.9796        | 0.91268266        | 0.183        |
| CU-V LHV        | Nest:Drone               | 32941.5653        | 39123.5341        | 1.27268412        | 0.092        |
| CU-V LHV        | Forager:Drone            | 8614.22684        | 45284.1371        | -0.5292954        | 0.684        |
| <b>CU-V RHV</b> | <b>Hatchling:Nest</b>    | <b>80965.8069</b> | <b>35889.0299</b> | <b>3.5164543</b>  | <b>0.001</b> |
| <b>CU-V RHV</b> | <b>Hatchling:Forager</b> | <b>60009.609</b>  | <b>39455.4482</b> | <b>2.39721158</b> | <b>0.004</b> |
| <b>CU-V RHV</b> | <b>Hatchling:Drone</b>   | <b>49871.8772</b> | <b>44595.6124</b> | <b>1.80728645</b> | <b>0.027</b> |
| CU-V RHV        | Nest:Forager             | 20956.1978        | 39538.5656        | 0.57686996        | 0.303        |
| CU-V RHV        | Nest:Drone               | 31093.9296        | 42354.8413        | 1.02296662        | 0.169        |
| CU-V RHV        | Forager:Drone            | 10137.7318        | 49371.2441        | -0.4439794        | 0.673        |
